# Supplementary material for: Formation and consumption of single-ring aromatic hydrocarbons and their precursors in premixed acetylene, ethylene and benzene flamesElectronic supplementary information (ESI) available: Thermodynamic and kinetic property data. See http://www.rsc.org/suppdata/cp/b1/b110089k/
Source: Royal Society of Chemistry journal article supplement (doi:10.1039/b110089k), 2002-04-30
Supplement: esitable2.doc [file esitable2.doc]

**Table II** Thermodynamic property data (Electronic Supplementary Information)

UNITS: **:** kcal mole-1, , Cp: cal mole-1 K-1

**SPECIES CP,300K CP,400K CP,500K CP,600K CP800K CP,1000K CP,1500K Reference**

H 52.10 27.39 4.97 4.97 4.97 4.97 4.97 4.97 4.97 Kee et al. [1]

H2 .00 31.21 6.90 6.96 7.00 7.02 7.07 7.21 7.73 Kee et al. [1]

C 171.31 37.76 4.98 4.98 4.97 4.97 4.97 4.97 4.97 Kee et al. [1]

CH 142.01 43.72 6.95 7.00 7.05 7.11 7.37 7.78 8.75 Kee et al. [1]

CH2a 102.68 45.12 7.94 8.30 8.66 9.02 9.72 10.39 11.85 Sumathi [2]

HCHb 94.59 46.12 8.20 8.54 8.88 9.21 9.85 10.44 11.73 Sumathi [2]

CH3 35.41 46.40 9.30 10.06 10.82 11.55 12.93 14.15 16.33 Sumathi et al. [3]

CH4 -17.90 44.47 8.43 9.84 11.14 12.41 15.00 17.25 20.63 Kee et al. [1]

O 59.56 38.47 5.23 5.14 5.08 5.05 5.02 5.00 4.98 Kee et al. [1]

OH 9.32 43.88 7.15 7.10 7.07 7.06 7.13 7.33 7.87 Kee et al. [1]

H2O -57.80 45.10 8.00 8.23 8.44 8.67 9.22 9.87 11.26 Kee et al. [1]

C2 200.24 47.64 10.27 9.49 8.94 8.60 8.45 8.62 8.93 Kee et al. [1]

C2H 136.03 50.17 9.21 9.79 10.31 10.78 11.56 12.14 12.96 Sumathi [2]

C2H2 54.19 48.66 11.32 12.47 13.39 14.15 15.32 16.21 17.94 Richter et al. [4,5]

C2H3 71.60 55.90 10.47 12.37 13.99 15.37 17.57 19.20 21.86 Sumathi [2]

C2H4 12.54 52.38 10.23 12.79 14.94 16.83 20.05 22.51 26.22 Kee et al. [1]

CO -26.42 47.21 6.95 7.03 7.14 7.27 7.61 7.95 8.41 Kee et al. [1]

C2H5 29.30 59.38 12.36 14.88 17.19 19.29 22.88 25.72 30.21 Sumathi et al. [3]

HCO 10.40 53.66 8.24 8.78 9.28 9.77 10.74 11.52 12.56 Kee et al. [1]

C2H6 -20.04 54.73 12.58 15.69 18.62 21.30 25.82 29.30 34.61 Kee et al. [1]

CH2O -27.70 52.25 8.40 9.50 10.50 11.47 13.36 14.88 16.97 Kee et al. [1]

CH3O 3.90 54.61 9.08 10.79 12.43 13.98 16.63 18.60 21.51 Kee et al. [1]

CH2OH -4.10 58.88 11.32 12.94 14.38 15.62 17.54 18.79 20.95 Kee et al. [1]

CH3OH -48.06 57.28 10.51 12.40 14.25 16.01 19.07 21.40 25.02 Kee et al. [1]

O2 .00 49.01 7.01 7.22 7.44 7.65 8.07 8.35 8.72 Kee et al. [1]

HO2 2.50 54.73 8.34 8.95 9.49 9.97 10.78 11.39 12.45 Kee et al. [1]

H2O2 -32.53 55.66 10.41 11.44 12.34 13.11 14.29 15.21 16.85 Kee et al. [1]

C3H2c 129.59 62.99 15.94 17.36 18.47 19.34 20.58 21.45 23.16 Sumathi [2]

H2CCCH 82.12 61.61 15.62 17.74 19.49 20.94 23.16 24.79 27.57 Sumathi [2]

C3H4CYd 68.72 57.87 12.22 15.71 18.65 21.12 24.94 27.67 31.82 Sumathi [2]

C3H4e 43.89 57.86 13.79 16.81 19.40 21.61 25.12 27.72 31.81 Sumathi [2]

C3H4Pf 43.65 58.85 14.18 16.95 19.37 21.48 24.90 27.51 31.68 Sumathi [2]

AR .00 36.98 4.97 4.97 4.97 4.97 4.97 4.97 4.97 Kee et al. [1]

C2Og 68.51 55.68 10.31 11.09 11.72 12.24 13.06 13.66 14.64 Kee et al. [1]

C3H5h 40.85 62.04 15.61 19.35 22.49 25.13 29.23 32.20 36.76 Sumathi [2]

HCCO 42.45 60.74 12.65 13.47 14.23 14.92 16.07 16.83 17.98 Kee et al. [1]

C3H6 5.43 63.59 15.24 19.05 22.44 25.46 30.46 34.30 40.23 Sumathi [2]

CH2CO -12.40 57.79 12.43 14.17 15.67 16.91 18.79 20.24 22.44 Kee et al. [1]

HCCOH 20.43 58.71 13.22 14.78 16.16 17.35 19.15 20.30 22.29 Kee et al. [1]

NC3H7 24.64 69.35 17.40 21.61 25.32 28.58 33.93 38.02 44.44 Sumathi et al. [3]

IC3H7 21.83 68.75 16.35 20.35 24.02 27.34 32.99 37.40 44.12 Sumathi [2]

CH2CHO 6.00 64.01 13.18 15.15 16.96 18.60 21.30 23.34 26.35 Kee et al. [1]

CH3CO -5.40 63.75 12.42 14.44 16.33 18.06 20.94 23.07 26.19 Kee et al. [1]

C3H8 -24.82 64.57 17.67 22.49 26.86 30.74 37.01 41.73 48.83 Kee et al. [1]

CH3CHO -39.51 63.05 13.25 15.87 18.31 20.52 24.17 26.88 30.87 Kee et al. [1]

CO2 -94.06 51.08 8.91 9.86 10.65 11.31 12.32 12.99 13.93 Kee et al. [1]

CH3OCH2 5.60 67.75 14.97 17.93 20.64 23.08 27.22 30.44 35.21 [6]

CH3OCH3 -43.72 64.36 15.21 18.82 22.12 25.13 30.28 34.35 40.46 Kee et al. [1]

C4H 155.09 60.90 14.10 15.37 16.56 17.66 19.59 21.15 23.44 Kee et al. [1]

C4H2 111.71 59.79 17.74 20.03 21.85 23.24 25.10 26.61 28.96 Kee et al. [1]

HCCHCCHi 129.89 69.07 18.02 20.82 23.29 25.41 28.56 30.46 33.46 Kee et al. [1]

H2CCCCHj 111.33 72.96 20.24 22.43 24.44 26.23 29.10 30.93 33.68 Kee et al. [1]

C4H4k 69.15 67.35 17.32 20.61 23.62 26.30 30.53 33.20 37.25 Kee et al. [1]

CH2CHCHCHl 86.10 73.08 19.38 23.47 27.21 30.54 35.76 38.89 43.16 Kee et al. [1]

CH2CHCCH2m 74.15 75.33 19.49 23.12 26.47 29.48 34.32 37.37 41.84 Kee et al. [1]

HCCCO 62.66 66.35 14.82 16.87 18.49 19.76 21.49 22.52 23.86 [6]

C4H6-1 39.78 69.48 19.52 23.77 27.49 30.74 36.07 40.15 46.53 [6]

C4H612 39.34 69.72 19.30 23.66 27.46 30.75 36.04 39.99 45.59 Burcat and McBride [7]

C4H613 26.05 66.51 19.11 24.32 28.50 31.86 36.85 40.52 46.33 Burcat and McBride [7]

HCCCHO 24.55 64.54 15.33 18.10 20.38 22.24 24.94 26.65 28.67 [6]

I-C4H7 30.24 70.74 20.02 25.37 29.91 33.77 39.84 44.27 51.11 Burcat and McBride [7]

CH2CHCO 17.30 64.42 15.00 17.89 20.49 22.73 26.10 28.63 32.35 Burcat and McBride [7]

CHCHCHOn 40.10 65.57 15.89 19.06 21.73 23.97 27.39 29.73 32.87 [6]

C4H8 -.13 73.57 20.50 25.92 30.78 35.05 41.82 46.85 55.09 Kee et al. [1]

CH2CHCHO -17.80 64.50 16.08 19.62 22.89 25.71 29.91 33.00 37.43 Burcat and McBride [7]

C2H5CO -8.61 73.62 18.27 21.52 24.95 28.28 33.92 37.66 45.67 Burcat and McBride [7]

C2H5CHO -45.90 72.78 19.36 23.04 26.94 30.70 37.11 42.15 50.42 Burcat and McBride [7]

CH3COCH3 -51.90 70.66 17.81 21.78 25.69 29.21 34.63 38.76 44.84 Burcat and McBride [7]

C5H2(L) 165.25 63.70 19.90 23.26 25.97 28.07 30.84 32.81 35.39 Kee et al. [1]

C5H3o 166.77 67.33 17.04 21.74 25.59 28.60 32.48 35.15 38.73 Burcat and McBride [7]

C5H3(L)p 144.02 70.55 20.98 24.38 27.03 29.16 32.47 34.90 38.52 Burcat and McBride [7]

C5H4q 131.81 66.83 17.60 22.64 27.00 30.53 35.25 38.60 43.20 Burcat and McBride [7]

C5H4(L)r 106.10 72.03 20.82 25.08 28.52 31.30 35.41 38.48 43.02 Burcat and McBride [7]

C5H5 62.57 64.84 19.51 25.22 29.82 33.51 38.86 42.44 47.91 Richter et al. [4]

C5H4Hs 97.32 67.59 18.28 24.06 28.79 32.65 38.35 42.20 47.84 [8]

C5H5(L)t 97.11 73.41 21.91 27.14 31.38 34.80 39.81 43.15 48.14 Burcat and McBride [7]

C5H6 33.20 65.87 18.74 25.19 30.49 34.85 41.36 45.82 52.40 Richter et al. [4]

H2C4Ou 54.60 66.44 17.27 19.62 21.79 23.73 26.81 28.73 31.51 Kee et al. [1]

C6H 213.17 74.12 22.14 25.22 27.67 29.53 31.81 33.27 35.88 Kee et al. [1]

C6H2 169.68 70.94 24.63 27.76 30.26 32.18 34.76 36.81 39.90 Kee et al. [1]

C6H3 158.46 76.31 24.27 28.01 31.14 33.69 37.35 40.04 43.91 Kee et al. [1]

BENZYNE 103.39 68.03 19.59 25.38 30.09 33.90 39.47 43.17 48.51 Richter et al. [4]

C6H4v 123.00 76.80 24.67 30.02 34.40 37.84 42.32 45.06 49.30 Burcat and McBride [7]

C6H5 81.01 68.00 19.90 26.50 31.89 36.26 42.69 46.99 53.22 Richter et al. [4]

C6H5(L)w 140.60 84.28 26.90 31.87 36.27 40.04 45.65 48.93 53.93 Kee et al. [1]

C6H6 19.82 64.58 20.23 27.45 33.40 38.28 45.54 50.49 57.71 Richter et al. [4]

C6H6Fx 50.59 67.83 34.56 36.83 38.94 40.89 44.36 47.29 61.52 Kee et al. [1]

C6H7y 49.35 72.56 22.90 30.54 36.82 41.98 49.68 54.96 62.82 [8]

C6H813z 25.41 72.50 22.74 30.88 37.73 43.48 52.30 58.48 67.44 [6]

C6H814aa 26.05 70.82 22.70 30.71 37.48 43.19 52.03 58.28 67.36 [6]

C5H5CH3ab 24.38 74.16 28.07 35.72 41.88 46.85 54.29 59.98 67.74 Burcat and McBride [7]

C5H4Oac 13.20 69.76 20.38 26.15 30.80 34.53 39.91 43.45 48.62 [8]

C5H5Oad 42.94 72.74 20.63 27.19 32.57 36.97 43.45 47.76 53.72 Zhong and Bozzelli [10]

C5H4OHae 15.90 74.09 23.05 29.40 34.44 38.41 43.98 47.53 52.85 Alzueta et al. [11] and [7]

C6H5CHaf 110.58 75.80 24.56 32.53 38.94 44.07 51.45 56.25 63.16 Sumathi [12]

C7H7ag 50.31 76.75 26.23 34.03 40.82 46.46 54.49 60.22 68.23 Burcat and McBride [7]

C7H8ah 11.95 76.53 24.84 33.10 40.59 46.92 55.94 62.44 71.57 Burcat and McBride [7]

C6H5O 13.00 73.15 23.53 30.63 36.40 41.08 47.90 52.42 58.87 [8]

C6H4OH 32.90 70.91 22.37 28.97 34.45 38.98 45.80 50.49 57.38 Zhang and McKinnon [14]

C6H5OH -23.03 73.93 25.20 32.83 38.98 43.93 51.14 56.03 63.44 [8]

A1C2H*2ai 135.37 82.29 29.05 36.16 41.93 46.59 53.39 57.91 64.48 Richter et al. [4,5]

C8H6aj 73.28 81.64 29.81 37.48 43.74 48.84 56.37 61.46 69.04 Richter et al. [4,5]

C6H5CHCHak 96.46 83.00 30.51 39.08 46.00 51.59 59.79 65.40 73.97 Richter et al. [5]

C8H7*2al 95.24 82.68 29.32 38.12 45.24 51.00 59.45 65.21 73.90 Richter et al. [5]

C8H8am 35.11 83.58 29.72 39.21 46.91 53.15 62.37 68.71 78.42 [8]

C6H5COan 26.10 84.90 25.73 32.70 38.60 43.57 51.16 56.38 63.44 Marinov et al. [15]

C8H10ao 7.10 86.21 30.71 41.08 49.85 57.21 68.52 76.35 87.33 Emdee et al. [16]

C6H5CHOap -8.79 80.31 26.85 35.03 41.86 47.44 55.52 60.94 68.53 Burcat and McBride [7]

C6H3O2aq 27.53 78.61 25.85 31.70 36.48 40.37 46.04 49.77 54.92 [17]

C6H5CH2OHar -24.00 79.01 27.78 36.80 44.90 51.69 61.11 67.83 77.15 Burcat and McBride [7]

C7H8Oas -23.90 87.41 28.13 37.00 44.55 50.94 60.84 67.76 77.42 Emdee et al. [16]

C6H5OCH3at -17.10 84.01 29.71 38.94 46.54 52.77 62.06 68.38 77.45 [6]

OC6H4O2au -22.40 80.20 26.27 33.02 38.51 42.96 49.46 53.74 59.76 [8]

PC6H4O2av -29.65 76.79 26.17 32.91 38.40 42.86 49.37 53.67 59.69 [8]

INDENE*aw 65.01 79.30 30.27 40.29 48.38 54.87 64.25 70.42 79.38 Richter et al. [4]

C6H5C3H2ax 112.93 94.28 30.93 39.56 46.90 53.11 62.76 69.56 79.03 [6]

INDENE 39.10 80.88 30.57 41.07 49.67 56.67 67.01 73.95 83.96 Richter et al. [4]

C6H3O3ay -41.61 88.06 27.48 33.76 38.96 43.25 49.65 53.99 60.04 [18]

A2T1az 118.00 83.14 31.92 41.67 49.60 56.02 65.36 71.50 80.10 [8]

A2T2ba 120.58 81.88 32.08 41.80 49.71 56.11 65.45 71.58 80.16 Richter et al. [4]

C10H7*1bb 96.95 83.16 32.29 42.91 51.54 58.52 68.67 75.36 84.84 Richter et al. [4,5]

C10H7*2 97.20 83.07 32.35 42.97 51.59 58.56 68.71 75.39 84.87 Richter et al. [4,5]

C10H8bc 35.99 80.40 32.66 43.93 53.14 60.61 71.59 78.90 89.36 Richter et al. [4,5]

A2CH2-1bd 61.45 89.43 38.51 50.96 60.98 69.01 80.63 88.39 99.96 [8]

A2CH2-2 61.67 89.45 38.70 51.13 61.13 69.12 80.70 88.43 100.01 [8]

A2CH3-1be 27.93 90.42 38.79 51.35 61.73 70.28 83.09 91.82 104.28 [8]

A2CH3-2 27.75 92.64 39.06 51.57 61.90 70.40 83.13 91.82 104.29 [8]

C10H7O-1bf 22.35 88.12 35.59 46.79 55.86 63.17 73.78 80.72 90.49 [8]

C10H7O-2 25.97 88.14 35.79 46.96 56.01 63.31 73.90 80.82 90.54 [8]

C10H7OH-1bg -7.36 91.08 37.81 49.37 58.71 66.23 77.16 84.44 95.09 [8]

C10H7OH-2 -7.15 88.77 37.45 49.20 58.64 66.21 77.14 84.39 95.09 [8]

A2C2H-1*2bh 150.92 94.23 40.77 52.04 61.16 68.49 79.10 86.06 96.04 Richter et al. [4]

A2C2H-2*1bi 150.65 95.36 41.01 52.23 61.30 68.60 79.15 86.09 96.04 Richter et al. [4]

A2C2H-2*3bj 150.87 95.08 41.01 52.24 61.33 68.66 79.27 86.24 96.14 [8]

A2C2H-1bk 88.73 94.63 41.35 53.26 62.93 70.76 82.16 89.71 100.58 Richter et al. [4,5]

A2C2H-2 88.58 93.60 41.44 53.33 62.98 70.78 82.14 89.68 100.58 Richter et al. [4]

A2R5bl 61.71 86.62 37.50 50.37 60.81 69.22 81.39 89.36 100.56 Richter et al. [4,5]

BIPHENbm 100.49 87.77 37.81 50.54 60.88 69.23 81.35 89.31 100.52 Richter et al. [4]

A2VINPbn 110.47 96.11 41.95 54.87 65.27 73.62 85.71 93.77 105.68 [8]

C12H9bo 103.56 95.60 40.03 53.26 63.95 72.55 85.04 93.35 105.44 Richter et al. [4]

HA2R5bp 68.09 89.31 39.38 52.72 63.56 72.32 85.08 93.50 105.47 Richter et al. [5]

BIPHENHbq 121.31 92.03 39.74 53.10 63.94 72.68 85.35 93.68 105.52 Richter et al. [4]

A2C2H3-2br 50.26 96.09 41.99 55.42 66.36 75.23 88.29 97.11 110.07 [8]

C12H10bs 43.50 93.27 40.45 54.24 65.46 74.55 87.90 96.88 109.93 Richter et al. [4]

A2R5H2bt 37.40 89.44 39.32 53.18 64.54 73.82 87.52 96.72 109.88 [8]

C6H5OC6H5bu 12.43 104.37 41.40 54.97 66.25 75.59 89.66 99.30 113.07 [6]

A3*1bv 109.20 96.61 44.36 59.03 70.93 80.53 94.45 103.57 116.40 Richter et al. [4]

A3*2bw 109.59 96.46 44.51 59.08 70.94 80.53 94.50 103.66 116.42 [8]

A3*3bx 109.38 96.58 44.51 59.14 71.01 80.58 94.48 103.59 116.39 [8]

A3*4by 107.24 96.44 44.41 59.10 71.02 80.63 94.57 103.69 116.46 Richter et al. [4]

A3*9bz 109.23 96.52 44.26 58.91 70.82 80.43 94.40 103.56 116.37 [8]

A3L*1ca 116.16 96.58 44.72 59.32 71.19 80.77 94.70 103.81 116.52 [8]

A3L*2cb 116.42 96.53 44.78 59.41 71.28 80.84 94.69 103.76 116.49 [8]

A3L*9cc 116.31 95.36 44.56 59.22 71.10 80.69 94.58 103.68 116.46 [8]

A3cd 48.09 95.25 44.70 60.03 72.52 82.64 97.42 107.19 120.95 Richter et al. [4]

A3Lce 55.18 93.87 45.07 60.36 72.80 82.88 97.59 107.30 121.02 [8]

A21C6H4cf 106.96 104.90 50.71 67.29 80.76 91.63 107.42 117.75 132.19 [8]

A22C6H4cg 109.25 102.40 50.26 66.97 80.53 91.48 107.34 117.71 132.17 [8]

***Footnotes***

a Singlet methylene (1CH2); b triplet methylene (3CH2); c propargylene (HCCCH), triplet; d cyclopropene; e allene (CH2CCH2); f propyne (CH3CCH); g CCO radical;h allyl (H2CCHCH2); i n-C4H3; j i-C4H3; k vinylacetylene (CH2CHCH); l n-C4H5; m i-C4H5; n group additivity with CH2CHCHO taken from [7] as starting point; o cyclic; p HCCCCCH2; q cyclic; r CH2CCHCCH; s 2-cyclpentadienyl; t 3-pentene-1-yne-5-yl (HCCCHCHCH2); u butadienone; v cis-1,5-hexadiyne-3-ene (cis-HCCCHCHCCH); w cis-hexa-1,3-dien-5-yn-yl (cis-HCCCHCHCHCH); x fulvene; y cyclohexadienyl; z 1,3-cyclohexadiene; aa 1,4-cyclohexadiene; ab 3-methylcyclopentadiene; ac cyclopentadiene-1-one, heat of formation from [9]; ad 1-oxyl-2,4-cyclopentadiene radical; ae 1-hydroxy-2,4-cyclopentadiene-1-yl; af triplet phenylcarbene; ag benzyl (C6H5CH2); ah toluene;

ai ; aj phenylacetylene; ak ; al ; am styrene; an benzaldehyde radical; ao ethylbenzene; ap benzaldehyde; aq ; ar benzylalcohol; as based

on the average of o-, m- and p-cresol (hydroxytoluene) properties; at methylphenylether; au o-benzoquinone: ; av p-benzoquinone: ;

aw 1-indenyl: ; ax ; ay ; az 1-naphthyne: ; ba 2-naphthyne: ; bb 1-naphthyl; bc naphthalene;

bd ; be 1-methylnaphthalene; bf 1-naphthoxy; bg 1-naphthol; bh ; bi ; bj ; bk 1-naphthylacetylene: ;

bl acenaphthylene: ; bm biphenylene: ; bn 2-naphthylvinyl: ; bo ; bp 1-acenaphthenyl: ; bq ;

br 2-vinylnaphthalene: ; bs biphenyl; bt acenaphthene: ; bu diphenylether; bv 1-phenanthryl: ; bw 2-phenanthryl: ;

bx 3-phenanthryl: ; by 4-phenanthryl: ; bz 9-phenanthryl: ; ca 1-anthracyl: ; cb 2-anthracyl: ;

cc 9-anthracyl: ; cd phenanthrene; ce anthracene; cf ; cg

***References***

1. Kee, R. J., Rupley, F. M., Miller, J. A., The Chemkin Thermodynamic Data Base, Sandia Technical Report SAND87-8215B, UC-4, Sandia

National Laboratories, Livermore, CA, April 1994.

2. Sumathi, R., personal communication, Massachusetts Institute of Technology, Cambridge, MA, 2001. *Ab initio* computation. Use of CBS-Q

methodology as described in [3].

3. Sumathi, R., Carstensen, H.-H. and Green, W. H. Reaction Rate Prediction via Group Additivity Part 1: H Abstraction from Alkanes by H and

CH3. J. Phys. Chem. A **105**, 6910-6925 (2001).

4. Richter, H., Benish, T. G., Mazyar, O. A., Green, W. H. and Howard, J. B. Formation of Polycyclic Aromatic Hydrocarbons and their Radicals

in a Nearly Sooting Premixed Benzene Flame. Proc. Combust. Inst. **28**, 2609-2618 (2000).

5. Richter, H., Mazyar, O., Sumathy, R., Green, W. H., Howard, J. B. and Bozzelli, J. W. Detailed Kinetic Study of the Growth of Small

Polycyclic Aromatic Hydrocarbons I. 1-Naphthyl+Ethyne. J. Phys. Chem. A **105**, 1561-1573 (2001).

6. Determined using group additivity: Ritter, E. R. and Bozzelli, J. W. THERM: Thermodynamic Property Estimation for Gas Phase Radicals and

Molecules. Int. J. Chem. Kinet. **23**, 767-778 (1991).

7. a) Burcat, A. and McBride, B. "1997 Ideal Gas Thermodynamic Data for Combustion and Air-Pollution Use" Technion Aerospace Engineering

(TAE) Report # 804 June 1997.

b) Alexander Burcat's Ideal Gas Thermochemical Database <ftp://ftp.technion.ac.il/pub/supported/aetdd/thermodynamics>; downloaded on

06/21/00.

8. Calculated by means of density functional theory using the BLYP functional in conjunction with the DZVP basis set. Procedure as described in

[4,5]. Heats of formation were taken from the NIST database [9] or – if not available - determined by means of isodesmic reactions.

9. Mallard, W. G., Linstrom, P. J., Eds.: NIST Chemistry WebBook, NIST Standard Reference Database Number 69, February 2000, National

Institute of Standards and Technology, Gaithersburg, MD 20899 (http://webbook.nist.gov).

10. Zhong, X. and Bozzelli, J. W. Thermochemical and Kinetic Analysis of the H, OH, HO2, O, and O2 Association Reactions with

Cyclopentadienyl Radical. J. Phys. Chem. A **102**, 3537-3555 (1998).

11. Alzueta, M. U., Glarborg, P. and Dam-Johansen, K. Experimental and Kinetic Modeling Study of the Oxidation of Benzene. Int. J. Chem.

Kinet. **32**, 498-522 (2000).

12. Sumathi, R., personal communication, Massachusetts Institute of Technology, Cambridge, MA, 2001. *Ab initio* computation. Use of CBS-

RAD methodology as described in [13].

13. Mayer, P. M., Parkinson, C. J., Smith, D. M., and Radom, L. An Assessment of Theoretical Procedures for the Calculation of Reliable Free

Radical Thermochemistry: A Recommended New Procedure. J. Chem. Phys. **108**, 604-615 (1998).

14. Zhang, H.-Y. and McKinnon, J. T. Elementary Reaction Modeling of High Temperature Benzene Combustion. Combust. Sci. and Tech. **107**,

261-300 (1995).

15. Marinov, N. M., Pitz, W. J., Westbrook, C. K., Castaldi, M. J. and Senkan, S. M. Modeling of Aromatic and Polycyclic Aromatic

Hydrocarbon Formation in Premixed Methane and Ethane Flames. Combust. Sci. and Tech. **116-117**, 211-287 (1996).

16. Emdee, J. L., Brezinsky, K. and Glassman, I. A Kinetic Model for the Oxidation of Toluene near 1200 K. J. Phys. Chem. **96**,

2151-2161 (1992).

17. Group additivity [6] via bond dissociation with p-benzoquinone (PC6H4O2) as parent molecule.

18. Semi-empirical quantum mechanical computation using AM1 [19].

19. Dewar, M. J. S., Zoebisch, E. G., Healy, E. F., Stewart, J. J. P. AM1: A New General Purpose Quantum Mechanical Molecular Model. J. Am.

Chem. Soc. **107**, 3902-3909 (1985).
